# Supplementary material for: Oomycete Soil Diversity Associated with Betula and Alnus in Forests and Urban Settings in the Nordic–Baltic Region
Source: MDPI journal article supplement (doi:10.3390/jof9090926), 2023-09-14
Supplement: s1 [file s1]

**Table S1.** List of all sequenced soil samples.

| Sample code | Country | Geolocation           | Dominant tree     | Site type |
|-------------|---------|-----------------------|-------------------|-----------|
| 92          | Estonia | 58°28'29"N 26°45'16"E | <i>Alnus</i> sp.  | Forest    |
| 170         | Estonia | 58°26'37"N 26°33'7"E  | <i>Alnus</i> sp.  | Forest    |
| 332         | Estonia | 58°29'43"N 26°46'32"E | <i>Alnus</i> sp.  | Forest    |
| 407         | Estonia | 59°5'47"N 27°21'40"E  | <i>Alnus</i> sp.. | Forest    |
| 467         | Estonia | 59°27'46"N 26°28'11"E | <i>Alnus</i> sp.  | Forest    |
| 482         | Estonia | 58°40'15"N 25°56'23"E | <i>Alnus</i> sp.  | Forest    |
| 486         | Estonia | 59°26'48"N 26°24'27"E | <i>Alnus</i> sp.. | Forest    |
| 495         | Estonia | 58°16'9"N 22°28'49"E  | <i>Alnus</i> sp.  | Forest    |
| 991         | Estonia | 58°33'27"N 26°49'43"E | <i>Alnus</i> sp.  | Forest    |
| 408         | Estonia | 58°59'57"N 26°45'29"E | <i>Alnus</i> sp.  | Park      |
| FIN1        | Finland | 62°36'48"N 27°3'19"E  | <i>Alnus</i> sp.  | Forest    |
| FIN2        | Finland | 62°36'49"N 27°2'35"E  | <i>Alnus</i> sp.  | Forest    |
| FIN3        | Finland | 63°0'14"N 27°11'52"E  | <i>Betula</i> sp. | Forest    |
| FIN4        | Finland | 62°50'59"N 27°10'1"E  | <i>Betula</i> sp. | Forest    |
| FIN5        | Finland | 62°51'26"N 26°50'2"E  | <i>Betula</i> sp. | Forest    |
| FIN6        | Finland | 62°41'41"N 27°3'8"E   | <i>Betula</i> sp. | Forest    |
| FIN7        | Finland | 62°27'34"N 27°35'9"E  | <i>Betula</i> sp. | Forest    |
| FIN8        | Finland | 62°27'36"N 27°36'52"E | <i>Betula</i> sp. | Forest    |
| FIN10       | Finland | 60°12'30"N 24°58'58"E | <i>Alnus</i> sp.  | Park      |
| FIN11       | Finland | 60°12'29"N 24°58'55"E | <i>Betula</i> sp. | Park      |

|       |           |                        |                   |        |
|-------|-----------|------------------------|-------------------|--------|
| FIN12 | Finland   | 60°11'51"N 24°54'18"E  | <i>Alnus</i> sp.  | Park   |
| FIN13 | Finland   | 60°10'26"N 24°56'39"E  | <i>Betula</i> sp. | Park   |
| FIN14 | Finland   | 60°13'07"N 25°02'53"E  | <i>Alnus</i> sp.  | Park   |
| FIN9  | Finland   | 60°12'47"N 24°58'56"E  | <i>Alnus</i> sp.  | Park   |
| LT1   | Lithuania | 62°36'48"N 27°3'19"E   | <i>Betula</i> sp. | Forest |
| LT3   | Lithuania | 63°0'14"N 27°11'52"E   | <i>Betula</i> sp. | Forest |
| LT4   | Lithuania | 62°50'59"N 27°10'1"E   | <i>Betula</i> sp. | Forest |
| LT5   | Lithuania | 62°51'26"N 26°50'2"E   | <i>Betula</i> sp. | Forest |
| LT6   | Lithuania | 62°41'41"N 27°3'8"E    | <i>Betula</i> sp. | Forest |
| LT7   | Lithuania | 62°27'34"N 27°35'9"E   | <i>Betula</i> sp. | Forest |
| LT10  | Lithuania | 60°12'30"N 24°58'58"E  | <i>Betula</i> sp. | Forest |
| LT11  | Lithuania | 60°12'29"N 24°58'55"E  | <i>Betula</i> sp. | Forest |
| LT12  | Lithuania | 60°11'51"N 24°54'18"E  | <i>Betula</i> sp. | Forest |
| LT13  | Lithuania | 60°10'26"N 24°56'39"E  | <i>Betula</i> sp. | Forest |
| LT14  | Lithuania | 60°13'07"N 25°02'53"E  | <i>Betula</i> sp. | Forest |
| LT15  | Lithuania | 54°29'58"N 23°51'41"E  | <i>Betula</i> sp. | Forest |
| LT16  | Lithuania | 55°05'12"N 22°26'46"E  | <i>Betula</i> sp. | Forest |
| LT17  | Lithuania | 54°36'43"N 24°52'35"E  | <i>Betula</i> sp. | Forest |
| LT19  | Lithuania | 55°40'34"N 21°06'36"E  | <i>Betula</i> sp. | Forest |
| LT20  | Lithuania | 54°36'42"N 24°52'35"E  | <i>Betula</i> sp. | Forest |
| TYT   | Lithuania | 55°39'49"N, 23°12'17"E | <i>Alnus</i> sp.  | Forest |
| ANT   | Lithuania | 55°48'31"N, 25°58'43"E | <i>Alnus</i> sp.  | Forest |
| PAN   | Lithuania | 55°52'79"N 25°21'23"E  | <i>Alnus</i> sp.  | Forest |

|       |           |                        |                   |        |
|-------|-----------|------------------------|-------------------|--------|
| JUO   | Lithuania | 55° 36' 32"N 21°7'54"E | <i>Alnus</i> sp.  | Forest |
| ZIO   | Lithuania | 56°02'99"N 23°11'39"E  | <i>Alnus</i> sp.  | Forest |
| MOL   | Lithuania | 55°26'08"N 25°32'41"E  | <i>Alnus</i> sp.  | Forest |
| UTE   | Lithuania | 55°34'73"N 25°47'75"E  | <i>Alnus</i> sp.  | Forest |
| JAG   | Lithuania | 54°44'02"N 24°34'61"E  | <i>Alnus</i> sp.  | Forest |
| LT2   | Lithuania | 62°36'49"N 27°2'35"E   | <i>Betula</i> sp. | Park   |
| LT8   | Lithuania | 62°27'36"N 27°36'52"E  | <i>Betula</i> sp. | Park   |
| LT9   | Lithuania | 60°12'47"N 24°58'56"E  | <i>Betula</i> sp. | Park   |
| VOK   | Lithuania | 54°26'67"N 25°06'59"E  | <i>Alnus</i> sp.  | Park   |
| LT18  | Lithuania | 55°50'24"N 23°08'17"E  | <i>Betula</i> sp. | Park   |
| Nor3  | Norway    | 60°46'25"N 11°09'51"E  | <i>Betula</i> sp. | Forest |
| Nor5  | Norway    | 59°17'46"N 11°04'28"E  | <i>Betula</i> sp. | Forest |
| Nor6  | Norway    | 59°30'53"N 11°12'43"E  | <i>Betula</i> sp. | Forest |
| Nor11 | Norway    | 59°45'29"N 10°04'01"E  | <i>Alnus</i> sp.  | Forest |
| Nor12 | Norway    | 59°45'01"N 10°17'04"E  | <i>Alnus</i> sp.  | Forest |
| Nor13 | Norway    | 60°47'54"N 11°06'27"E  | <i>Alnus</i> sp.  | Forest |
| Nor14 | Norway    | 60°55'57"N 10°56'51"E  | <i>Alnus</i> sp.  | Forest |
| Nor16 | Norway    | 61°26'42"N 11°02'28"E  | <i>Alnus</i> sp.  | Forest |
| Nor17 | Norway    | 59°19'26"N 10°57'20"E  | <i>Alnus</i> sp.  | Forest |
| Nor18 | Norway    | 59°43'13"N 10°28'26"E  | <i>Alnus</i> sp.  | Forest |
| Nor19 | Norway    | 59°41'38"N 10°44'03"E  | <i>Alnus</i> sp.  | Forest |
| Nor1  | Norway    | 59°45'07"N 10°01'12"E  | <i>Betula</i> sp. | Park   |
| Nor2  | Norway    | 59°45'34"N 10°04'109"E | <i>Betula</i> sp. | Park   |

|       |        |                       |                   |        |
|-------|--------|-----------------------|-------------------|--------|
| Nor4  | Norway | 61°45'43"N 11°22'05"E | <i>Betula</i> sp. | Park   |
| Nor7  | Norway | 59°45'07"N 10°01'12"E | <i>Betula</i> sp. | Park   |
| Nor8  | Norway | 59°39'56"N 10°45'49"E | <i>Betula</i> sp. | Park   |
| Nor9  | Norway | 59°39'17"N 10°47'19"E | <i>Betula</i> sp. | Park   |
| Nor10 | Norway | 59°38'55"N 10°47'49"E | <i>Betula</i> sp. | Park   |
| Nor15 | Norway | 62°07'06"N 10°38'10"E | <i>Alnus</i> sp.  | Park   |
| Nor20 | Norway | 59°40'07"N 10°46'09"E | <i>Alnus</i> sp.  | Park   |
| B1    | Sweden | 59°52'4"N 17°42'48"E  | <i>Betula</i> sp. | Forest |
| B2    | Sweden | 59°54'8"N 17°33'28"E  | <i>Betula</i> sp. | Forest |
| B3    | Sweden | 59°53'0"N 17°13'12"E  | <i>Betula</i> sp. | Forest |
| B4    | Sweden | 59°53'0"N 17°14'47"E  | <i>Betula</i> sp. | Forest |
| B5    | Sweden | 59°45'30"N 17°38'46"E | <i>Betula</i> sp. | Forest |
| A3    | Sweden | 59°54'39"N 17°31'53"E | <i>Alnus</i> sp.  | Forest |
| F1    | Sweden | 58°30'7"N 13°28'7"E   | <i>Betula</i> sp. | Forest |
| F2    | Sweden | 57°25'57"N 14°24'1"E  | <i>Betula</i> sp. | Forest |
| F3    | Sweden | 57°45'33"N 13°45'33"E | <i>Betula</i> sp. | Forest |
| F4    | Sweden | 57°7'45"N 14°45'19"E  | <i>Betula</i> sp. | Forest |
| F6    | Sweden | 57°3'26"N 15°10'4"E   | <i>Betula</i> sp. | Forest |
| F7    | Sweden | 57°29'33"N 15°32'6"E  | <i>Betula</i> sp. | Forest |
| F8    | Sweden | 57°40'32"N 11°57'11"E | <i>Alnus</i> sp.  | Forest |
| F9    | Sweden | 55°39'28"N 13°4'22"E  | <i>Alnus</i> sp.  | Forest |
| F10   | Sweden | 57°40'32"N 11°57'12"E | <i>Betula</i> sp. | Forest |
| F11   | Sweden | 56°6'23"N 13°20'11"E  | <i>Betula</i> sp. | Forest |

|     |        |                       |                   |      |
|-----|--------|-----------------------|-------------------|------|
| A1  | Sweden | 59°49'53"N 17°39'39"E | <i>Alnus</i> sp.  | Park |
| A4  | Sweden | 59°46'35"N 16°58'37"E | <i>Alnus</i> sp.  | Park |
| A5  | Sweden | 59°46'59"N 17°37'31"E | <i>Alnus</i> sp.  | Park |
| P1  | Sweden | 57°31'41"N 13°4'40"E  | <i>Alnus</i> sp.  | Park |
| P2  | Sweden | 57°31'44"N 13°4'47"E  | <i>Alnus</i> sp.  | Park |
| P3  | Sweden | 57°31'45"N 13°4'48"E  | <i>Alnus</i> sp.  | Park |
| P4  | Sweden | 57°31'49"N 13°4'59"E  | <i>Alnus</i> sp.  | Park |
| P5  | Sweden | 57°31'47"N 13°4'41"E  | <i>Alnus</i> sp.  | Park |
| P6  | Sweden | 55°39'26"N 13°4'42"E  | <i>Betula</i> sp. | Park |
| P7  | Sweden | 55°39'27"N 13°4'44"E  | <i>Betula</i> sp. | Park |
| P8  | Sweden | 55°39'26"N 13°4'42"E  | <i>Betula</i> sp. | Park |
| P9  | Sweden | 56°1'46"N 14°10'9"E   | <i>Betula</i> sp. | Park |
| P10 | Sweden | 56°1'43"N 14°9'5"E    | <i>Alnus</i> sp.  | Park |
| P11 | Sweden | 57°29'59"N 13°7'8"E   | <i>Alnus</i> sp.  | Park |
| P12 | Sweden | 57°30'3"N 13°7'11"E   | <i>Alnus</i> sp.  | Park |
| P13 | Sweden | 57°29'56"N 13°7'5"E   | <i>Alnus</i> sp.  | Park |
| P14 | Sweden | 57°29'54"N 13°7'4"E   | <i>Alnus</i> sp.  | Park |
| P15 | Sweden | 57°29'52"N 13°6'58"E  | <i>Alnus</i> sp.  | Park |
| P16 | Sweden | 55°40'57"N 13°4'31"E  | <i>Alnus</i> sp.  | Park |
| P17 | Sweden | 55°41'2"N 13°4'36"E   | <i>Alnus</i> sp.  | Park |
| F12 | Sweden | 55°39'35"N 13°4'25"E  | <i>Betula</i> sp. | Park |
| A2  | Sweden | 59°57'9"N 17°40'1"E   | <i>Alnus</i> sp.  | Pond |
