# Supplementary material for: Oomycete Soil Diversity Associated with Betula and Alnus in Forests and Urban Settings in the Nordic–Baltic Region
Source: MDPI journal article supplement (doi:10.3390/jof9090926), 2023-09-14
Supplement: s1 [file s1]

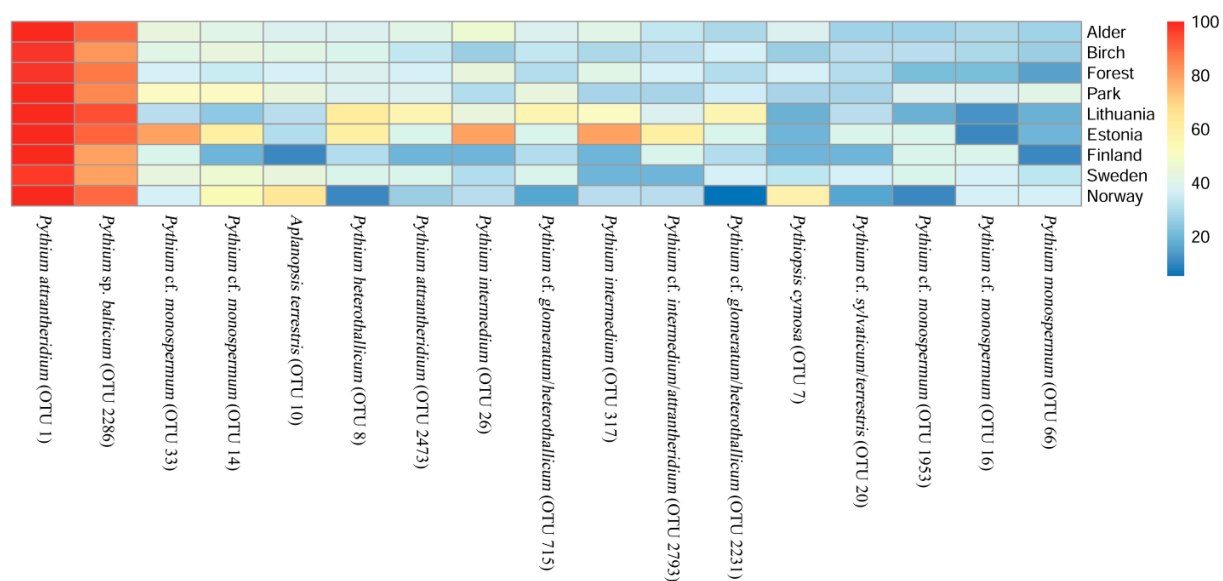

**Figure S1.** Heatmap of the most prevalent oomycete OTUs that were present in at least 20 sites.

Colors indicate the proportion (%) of samples that contained the OTU in each group.
