# Supplementary material for: Oomycete Soil Diversity Associated with Betula and Alnus in Forests and Urban Settings in the Nordic–Baltic Region
Source: J Fungi (Basel). 2023 Sep 14;9(9):926. doi: 10.3390/jof9090926 (PMC10532727; doi:10.3390/jof9090926)
Supplement: Supplementary file 1 [file jof-09-00926-s001.zip › Supplementary Table S2.xlsx]

## Sheet: env_85
Table S2. Raw climatic and environmental data of the analyzed soil samples.
Site	Country	Sitetype	Latitude	Longitude	Dominant tree species	Annual Mean Temperature	Mean Temperature of Warmest Quarter	Mean Temperature of Coldest Quarter	Annual Precipitation	Precipitation of Wettest Month	Precipitation of Driest Month	Precipitation Seasonality	Precipitation of Wettest Quarter	Precipitation of Driest Quarter	Precipitation of Warmest Quarter	Precipitation of Coldest Quarter	Mean Diurnal Range	Isothermality	Temperature Seasonality	Max Temperature of Warmest Month	Min Temperature of Coldest Month	Temperature Annual Range	Mean Temperature of Wettest Quarter	Mean Temperature of Driest Quarter
92	Estonia	Forest	58.4747	26.7544	Alder	5.25	15.95	-5.02	612	79	28	34.6	221	91	220	105	8.11	25.66	852.67	22.6	-9	31.6	14.52	-0.92
170	Estonia	Forest	58.4436	26.5519	Alder	5.44	16	-4.73	623	80	29	34.46	225	91	222	109	8.07	25.72	843.1	22.6	-8.8	31.4	14.62	-0.67
332	Estonia	Forest	58.4953	26.7756	Alder	5.2	15.88	-5.03	617	80	28	34.97	224	91	223	106	8.06	25.5	851.05	22.6	-9	31.6	14.45	-0.98
407	Estonia	Forest	59.0964	27.3611	Alder	4.74	15.67	-6.03	624	82	26	37.8	234	86	219	103	7.9	24.09	882.19	22.5	-10.3	32.8	14.47	-5.5
408	Estonia	Park	58.9992	26.7581	Alder	4.91	15.63	-5.15	614	81	27	36.06	226	89	220	105	8.09	25.37	849.4	22.8	-9.1	31.9	14.43	-4.93
467	Estonia	Forest	59.4628	26.4697	Alder	5.32	15.82	-4.48	598	80	28	35.07	215	89	208	107	7.57	24.44	827.81	22.4	-8.6	31	14.83	-1.1
482	Estonia	Forest	58.6708	25.9397	Alder	5.39	15.95	-4.87	655	82	32	32.19	226	99	217	124	8.31	25.96	848.14	23.1	-8.9	32	14.75	-0.78
486	Estonia	Forest	59.4467	26.4075	Alder	5.25	15.73	-4.58	611	81	29	34.84	218	92	210	111	7.63	24.6	828.74	22.3	-8.7	31	14.73	-1.12
495	Estonia	Forest	58.2692	22.4803	Alder	6.8	16.33	-1.62	610	73	32	31.65	212	99	170	107	6.07	22.92	742.72	21.3	-5.2	26.5	7.63	4.82
991	Estonia	Forest	58.5575	26.8286	Alder	5.21	15.83	-4.9	611	79	27	35.69	225	89	221	104	7.94	25.29	844.4	22.6	-8.8	31.4	14.43	-0.93
FIN10	Finland	Park	60.2083	24.9828	Alder	5.33	15.82	-4.15	642	77	32	29.9	216	106	191	138	6.36	21.93	813	20.8	-8.2	29	10.7	3.8
FIN11	Finland	Park	60.2081	24.9819	Birch	5.33	15.82	-4.15	642	77	32	29.9	216	106	191	138	6.36	21.93	813	20.8	-8.2	29	10.7	3.8
FIN12	Finland	Park	60.1975	24.905	Alder	5.16	15.68	-4.4	641	77	32	29.65	215	107	191	137	6.31	21.6	816.78	20.7	-8.5	29.2	10.57	3.63
FIN13	Finland	Park	60.1739	24.9442	Birch	5.37	15.8	-4.03	650	76	32	28.29	217	116	188	137	5.88	20.61	808.41	20.5	-8	28.5	10.83	3.7
FIN14	Finland	Park	60.2186	25.0481	Alder	5.14	15.75	-4.48	649	78	33	29.5	217	109	192	140	6.65	22.39	824.03	21	-8.7	29.7	10.57	3.63
FIN2	Finland	Forest	62.6136	27.0431	Alder	2.7	14.47	-8.5	618	84	30	33.69	225	96	225	116	7.81	22.97	922.64	21	-13	34	14.47	-4.02
FIN4	Finland	Forest	62.8497	27.1669	Birch	2.7	14.57	-8.67	606	81	30	33.58	223	95	223	114	7.51	22.21	932.82	20.8	-13	33.8	14.57	-4
FIN5	Finland	Forest	62.8572	26.8339	Birch	2.71	14.57	-8.5	624	84	31	32.71	227	100	227	119	7.78	22.63	926.91	21	-13.4	34.4	14.57	-4.23
FIN6	Finland	Forest	62.6947	27.0522	Birch	2.58	14.35	-8.58	617	84	30	34.38	227	95	227	115	7.71	22.81	921.58	20.8	-13	33.8	14.35	-4.1
FIN8	Finland	Forest	62.46	27.6144	Birch	2.98	14.9	-8.38	600	81	30	32.8	217	99	217	112	7.35	21.75	933.9	21	-12.8	33.8	14.9	-3.87
ANT	Lithuania	Forest	55.8086	25.9786	Alder	5.93	16.35	-4.5	644	76	32	28.18	225	109	225	121	8.12	26.01	845.55	22.9	-8.3	31.2	16.35	-3.6
JAG	Lithuania	Forest	54.7339	24.5836	Alder	6.19	16.18	-4.2	626	78	28	28.26	217	103	217	115	8.49	27.75	832.25	22.2	-8.4	30.6	16.18	-3.5
LT1	Lithuania	Forest	62.6133	27.0553	Birch	2.68	14.47	-8.52	622	84	30	33.67	227	97	227	116	7.81	22.97	923.19	21	-13	34	14.47	-4.02
LT12	Lithuania	Forest	60.1975	24.905	Birch	5.16	15.68	-4.4	641	77	32	29.65	215	107	191	137	6.31	21.6	816.78	20.7	-8.5	29.2	10.57	3.63
LT16	Lithuania	Forest	55.0867	22.4461	Birch	6.82	16.4	-2.73	718	85	32	28.94	240	111	240	140	7.23	26.02	781.84	22	-5.8	27.8	16.4	1.3
LT17	Lithuania	Forest	54.6119	24.8764	Birch	5.95	15.97	-4.35	651	82	29	28.12	224	107	224	121	8.22	27.24	830.26	21.8	-8.4	30.2	15.97	-3.63
LT19	Lithuania	Forest	55.6761	21.11	Birch	7.64	16.55	-0.75	751	90	35	32.82	264	114	205	165	5.55	23.03	714.69	20.6	-3.5	24.1	8.57	1.9
LT2	Lithuania	Park	62.6136	27.0431	Birch	2.7	14.47	-8.5	618	84	30	33.69	225	96	225	116	7.81	22.97	922.64	21	-13	34	14.47	-4.02
LT4	Lithuania	Forest	62.8497	27.1669	Birch	2.7	14.57	-8.67	606	81	30	33.58	223	95	223	114	7.51	22.21	932.82	20.8	-13	33.8	14.57	-4
LT5	Lithuania	Forest	62.8572	26.8339	Birch	2.71	14.57	-8.5	624	84	31	32.71	227	100	227	119	7.78	22.63	926.91	21	-13.4	34.4	14.57	-4.23
LT8	Lithuania	Park	62.46	27.6144	Birch	2.98	14.9	-8.38	600	81	30	32.8	217	99	217	112	7.35	21.75	933.9	21	-12.8	33.8	14.9	-3.87
LT9	Lithuania	Park	60.2131	24.9822	Birch	5.32	15.82	-4.17	641	77	32	29.92	216	106	190	138	6.44	22.06	814.07	20.9	-8.3	29.2	10.68	3.8
PAN	Lithuania	Forest	55.8886	25.3564	Alder	6.15	16.42	-4.12	634	75	30	27.31	216	105	216	118	8.07	26.28	833.97	22.9	-7.8	30.7	16.42	-3.3
UTE	Lithuania	Forest	55.5869	25.8042	Alder	6	16.27	-4.28	647	76	32	27.37	224	109	224	121	8.26	26.9	835.83	22.8	-7.9	30.7	16.27	-3.45
VOK	Lithuania	Park	54.4519	25.1164	Alder	6.16	16.15	-3.92	652	82	31	27.12	222	110	222	124	8.01	27.15	822.41	21.8	-7.7	29.5	16.15	-3.18
ZIO	Lithuania	Forest	56.0608	23.1942	Alder	6.29	16.07	-3.3	614	79	27	30.67	216	98	216	113	7.24	25.96	790.55	21.6	-6.3	27.9	16.07	0.57
Nor1	Norway	Park	59.7519	10.02	Birch	6.05	16.05	-3.57	770	93	35	29.62	262	127	225	138	7.76	26.75	793.28	22.1	-6.9	29	6	0.75
Nor10	Norway	Park	59.6486	10.7969	Birch	5.93	15.45	-3.02	777	93	38	26.05	260	140	214	153	7.67	27.48	750.32	21.2	-6.7	27.9	6.07	0.48
Nor11	Norway	Forest	59.7581	10.0669	Alder	6.05	16	-3.45	777	93	35	29.42	264	128	227	140	7.61	26.51	786.26	21.9	-6.8	28.7	6.05	0.72
Nor12	Norway	Forest	59.7503	10.2844	Alder	6.22	16.1	-3.17	785	93	37	28.17	265	134	225	147	7.3	25.8	779.27	21.8	-6.5	28.3	6.28	0.77
Nor14	Norway	Forest	60.9325	10.9475	Alder	2.75	13.25	-7.53	647	80	26	34.48	231	96	231	107	8.17	26.34	840.12	19.6	-11.4	31	13.25	-2.93
Nor15	Norway	Park	62.1183	10.6361	Alder	1.73	11.48	-7.52	452	75	16	50.02	196	55	196	65	8.28	28.47	771.48	17.8	-11.3	29.1	11.48	-3.3
Nor16	Norway	Forest	61.445	11.0411	Alder	2.88	13.53	-7.77	554	74	21	39.14	213	75	213	87	9.17	28.12	856.47	20.6	-12	32.6	13.53	-2.57
Nor17	Norway	Forest	59.3239	10.9556	Alder	6.58	15.73	-2.03	792	96	43	25.01	267	148	201	172	7.28	27.18	723.62	21.1	-5.7	26.8	7.02	1.12
Nor18	Norway	Forest	59.7203	10.4739	Alder	6.05	15.57	-2.88	800	95	39	27.12	269	140	225	154	6.97	25.61	749.44	21	-6.2	27.2	6.2	0.62
Nor19	Norway	Forest	59.6939	10.7342	Alder	6.12	15.63	-2.82	735	88	35	27.13	246	130	208	141	7.41	26.74	749.47	21.3	-6.4	27.7	6.27	0.68
Nor2	Norway	Park	59.7594	10.0969	Birch	5.97	15.88	-3.45	781	94	36	29.29	265	130	228	141	7.58	26.52	782.21	21.8	-6.8	28.6	5.95	0.63
Nor20	Norway	Park	59.6686	10.7692	Alder	5.92	15.45	-3.03	763	92	37	26.64	256	136	212	150	7.51	27.01	750.52	21.1	-6.7	27.8	6.07	0.47
Nor3	Norway	Forest	60.7736	11.1642	Birch	3.82	14.62	-7.15	564	72	22	36.73	206	80	206	90	9.06	27.45	878.14	21.2	-11.8	33	14.62	-2.18
Nor4	Norway	Park	61.7619	11.3681	Birch	0.63	11.25	-9.7	604	82	23	40.84	234	80	234	93	9.45	28.64	846.85	18.3	-14.7	33	11.25	-4.98
Nor5	Norway	Forest	59.2961	11.0744	Birch	6.65	15.82	-1.82	807	96	44	24.79	270	148	208	177	6.99	26.28	719.61	21.1	-5.5	26.6	7.07	1.07
Nor6	Norway	Forest	59.5147	11.2119	Birch	6.11	15.32	-2.5	786	95	39	26.88	263	134	220	160	7.47	27.55	725.91	21	-6.1	27.1	6.43	0.62
Nor7	Norway	Park	59.7519	10.02	Birch	6.05	16.05	-3.57	770	93	35	29.62	262	127	225	138	7.76	26.75	793.28	22.1	-6.9	29	6	0.75
Nor8	Norway	Park	59.6656	10.7636	Birch	6.02	15.53	-2.97	761	91	37	26.38	255	137	211	149	7.57	27.22	751.96	21.2	-6.6	27.8	6.2	0.55
Nor9	Norway	Park	59.6547	10.7886	Birch	5.85	15.35	-3.07	785	94	38	26.35	263	141	217	155	7.61	27.37	748.65	21.1	-6.7	27.8	6	0.42
A3	Sweden	Forest	59.9108	17.5314	Alder	5.59	15.2	-3.13	568	72	27	29.3	197	95	191	110	8.05	28.15	747.49	21.5	-7.1	28.6	14.05	-0.23
A4	Sweden	Park	59.7764	16.9769	Alder	5.92	15.73	-3.17	580	68	27	28.24	194	98	192	111	8.44	28.81	765.51	22.2	-7.1	29.3	14.47	0.27
A5	Sweden	Park	59.7831	17.6253	Alder	5.85	15.4	-2.73	552	71	25	30.27	192	92	188	105	7.78	27.47	739.03	21.4	-6.9	28.3	14.22	-0.05
B1	Sweden	Forest	59.8678	17.7133	Birch	5.78	15.53	-3.1	577	73	26	31.1	203	94	197	111	8.13	28.11	757.58	21.8	-7.1	28.9	14.27	-0.05
B4	Sweden	Forest	59.8833	17.2464	Birch	5.65	15.28	-3.08	598	72	28	27.92	202	103	198	117	8.24	28.52	746.59	21.8	-7.1	28.9	14.12	0
B5	Sweden	Forest	59.7583	17.6461	Birch	5.72	15.13	-2.7	554	72	25	31.28	194	90	189	106	7.66	27.45	728.92	21	-6.9	27.9	14	-0.2
F10	Sweden	Forest	57.6756	11.9533	Birch	7.62	16.12	-0.12	811	83	46	20.58	248	150	208	203	6.85	27.85	664.29	21.3	-3.3	24.6	8.12	2.32
F11	Sweden	Forest	56.1064	13.3364	Birch	7.32	15.37	-0.07	829	85	47	20.24	248	156	219	207	7.18	30.18	633.11	20.7	-3.1	23.8	4.23	6.1
F12	Sweden	Park	55.6597	13.0736	Birch	8.31	16.38	0.93	576	61	29	21.21	177	104	156	130	6.23	27.22	637.12	21.1	-1.8	22.9	9.1	3.07
F6	Sweden	Forest	57.0572	15.1678	Birch	5.68	14.53	-2.33	683	73	40	18.86	203	126	198	156	8.21	30.63	689.29	20.9	-5.9	26.8	13.4	0.37
F7	Sweden	Forest	57.4925	15.535	Birch	5.83	14.87	-2.28	618	71	34	23.6	199	109	198	129	8.64	31.31	699.27	21.6	-6	27.6	13.68	0.48
F8	Sweden	Forest	57.6756	11.9531	Alder	7.62	16.12	-0.12	811	83	46	20.58	248	150	208	203	6.85	27.85	664.29	21.3	-3.3	24.6	8.12	2.32
F9	Sweden	Forest	55.6578	13.0728	Alder	8.35	16.48	0.98	577	62	29	21.25	178	105	155	130	6.23	27.18	639.45	21.2	-1.7	22.9	9.12	3.1
P1	Sweden	Park	57.5281	13.0778	Alder	6.2	14.73	-1.67	970	104	54	22.1	304	177	242	247	8.07	30.91	668.98	20.8	-5.3	26.1	6.67	5.07
P10	Sweden	Park	56.0286	14.1514	Alder	7.65	15.83	0.38	621	63	35	19.01	181	115	178	139	7.63	31.38	632.53	21.9	-2.4	24.3	14.97	2.72
P11	Sweden	Park	57.4997	13.1189	Alder	6.19	14.77	-1.68	963	103	54	22.05	302	176	242	243	8.17	31.17	671.26	20.9	-5.3	26.2	6.63	5.05
P12	Sweden	Park	57.5008	13.1197	Alder	6.24	14.82	-1.67	958	103	54	22.55	302	174	241	241	8.18	31.08	671.95	21	-5.3	26.3	6.68	5.12
P13	Sweden	Park	57.4989	13.1181	Alder	6.19	14.77	-1.68	963	103	54	22.05	302	176	242	243	8.17	31.17	671.26	20.9	-5.3	26.2	6.63	5.05
P14	Sweden	Park	57.4983	13.1178	Alder	6.19	14.77	-1.68	963	103	54	22.05	302	176	242	243	8.17	31.17	671.26	20.9	-5.3	26.2	6.63	5.05
P15	Sweden	Park	57.4978	13.1161	Alder	6.25	14.83	-1.67	962	103	54	22.21	302	176	242	242	8.19	31.15	671.87	21	-5.3	26.3	6.68	5.13
P16	Sweden	Park	55.6825	13.0753	Alder	8.29	16.4	0.88	578	61	29	20.74	177	105	156	130	6.29	27.36	640.36	21.2	-1.8	23	9.07	3.05
P17	Sweden	Park	55.6839	13.0767	Alder	8.27	16.35	0.88	579	61	29	20.84	177	105	157	130	6.33	27.54	638.15	21.2	-1.8	23	9.05	3.07
P2	Sweden	Park	57.5289	13.0797	Alder	6.2	14.73	-1.67	970	104	54	22.1	304	177	242	247	8.07	30.91	668.98	20.8	-5.3	26.1	6.67	5.07
P3	Sweden	Park	57.5292	13.08	Alder	6.2	14.73	-1.67	970	104	54	22.1	304	177	242	247	8.07	30.91	668.98	20.8	-5.3	26.1	6.67	5.07
P4	Sweden	Park	57.5303	13.0831	Alder	6.2	14.73	-1.67	970	104	54	22.1	304	177	242	247	8.07	30.91	668.98	20.8	-5.3	26.1	6.67	5.07
P5	Sweden	Park	57.5297	13.0781	Alder	6.2	14.73	-1.67	970	104	54	22.1	304	177	242	247	8.07	30.91	668.98	20.8	-5.3	26.1	6.67	5.07
P6	Sweden	Park	55.6572	13.0783	Birch	8.34	16.47	0.93	578	62	29	21.26	178	105	156	130	6.28	27.2	640.54	21.3	-1.8	23.1	9.12	3.1
P7	Sweden	Park	55.6575	13.0789	Birch	8.34	16.47	0.93	578	62	29	21.26	178	105	156	130	6.28	27.2	640.54	21.3	-1.8	23.1	9.12	3.1
P8	Sweden	Park	55.6572	13.0783	Birch	8.34	16.47	0.93	578	62	29	21.26	178	105	156	130	6.28	27.2	640.54	21.3	-1.8	23.1	9.12	3.1
P9	Sweden	Park	56.0294	14.1692	Birch	7.65	15.82	0.35	613	63	34	19.84	181	112	177	136	7.54	31.04	633.02	21.8	-2.5	24.3	14.97	2.68
